# Supplementary material for: SMYD1a protects the heart from ischemic injury by regulating OPA1-mediated cristae remodeling and supercomplex formation
Source: Springer Nature journal article supplement (doi:10.1007/s00395-023-00991-6), 2023-05-22
Supplement: MOESM1 [file 25389990]

## Supplementary Materials for

### SMYD1a Protects the Heart from Ischemic Injury by Regulating OPA1 Mediated Cristae Remodeling and Supercomplex Formation.

Marta W. Szulik<sup>1\*</sup>, Steven Valdez<sup>1</sup>, Maureen Walsh<sup>2</sup>, Kathryn Davis<sup>1</sup>, Ryan Bia<sup>1</sup>, Emilee Horiuchi<sup>1</sup>, Sean O'Very<sup>1</sup>, Anil K. Laxman<sup>3</sup>, Linda Sandaklie-Nicolova<sup>4</sup>, David R. Eberhardt<sup>1</sup>, Jessica R. Durrant<sup>5</sup>, Hanin Sheikh<sup>1</sup>, Samuel Hickenlooper<sup>1</sup>, Magnus Creed<sup>1</sup>, Cameron Brady<sup>1</sup>, Mickey Miller<sup>1</sup>, Li Wang<sup>1</sup>, June Garcia-Llana<sup>1</sup>, Christopher Tracy<sup>1</sup>, Stavros G. Drakos<sup>1,6</sup>, Katsuhiko Funai<sup>2</sup>, Dipayan Chaudhuri<sup>1,6,7</sup>, Sihem Boudina<sup>8</sup>, Sarah Franklin<sup>1,6\*</sup>.

<sup>1</sup> Nora Eccles Harrison Cardiovascular Research and Training Institute, University of Utah, Salt Lake City, UT

<sup>2</sup> Diabetes & Metabolism Research Center, University of Utah, Salt Lake City, UT, USA

<sup>3</sup> Metabolic Phenotypic Core Facility, University of Utah, Salt Lake City, UT, USA

<sup>4</sup> Electron Microscopy Core Laboratory, University of Utah, Salt Lake City, UT, USA

<sup>5</sup> Dallas Tissue Research, Farmers Branch, TX, USA

<sup>6</sup> Division of Cardiovascular Medicine, Department of Internal Medicine, University of Utah, School of Medicine, Salt Lake City, UT, USA

<sup>7</sup> Department of Biochemistry, Department of Biomedical Engineering, University of Utah, Salt Lake City, UT, USA

<sup>8</sup> Department of Nutrition and Integrative Physiology, Program in Molecular Medicine, University of Utah, Salt Lake City, UT, USA.

\*Denotes co-corresponding authors: Marta W. Szulik and Sarah Franklin.

**Email:** [m.szulik@utah.edu](mailto:m.szulik@utah.edu), [sarah.franklin@utah.edu](mailto:sarah.franklin@utah.edu)

**Table S1.** Clinical characteristics of the study population. Left ventricular ejection fraction (LVEF) and left ventricular end diastolic diameter (LVEDD) at both LVAD implantation (pre-LVAD) and LVAD explantation/cardiac transplantation (post-LVAD) showing clinical differences between Responders and Non-Responders. (Values reported as Mean  $\pm$  SEM).

| <b>Variable</b>                                    | <b>Responders N=5</b> | <b>Non-responders N=5</b> | <b>p-value</b> |
|----------------------------------------------------|-----------------------|---------------------------|----------------|
| Male sex, (%)                                      | 4 (80)                | 4 (80)                    |                |
| Age at LVAD implantation, years                    | 56.2 $\pm$ 9.7        | 54.2 $\pm$ 7.6            | 0.876          |
| <b>Pre-LVAD</b>                                    |                       |                           |                |
| LVEDD, cm                                          | 5.2 $\pm$ 0.5         | 6.2 $\pm$ 0.5             | 0.159          |
| LVEF, %                                            | 38.8 $\pm$ 7.2        | 16.2 $\pm$ 3.1            | 0.017          |
| <b>Post-LVAD</b>                                   |                       |                           |                |
| LVEDD, cm                                          | 5.0 $\pm$ 0.2         | 5.8 $\pm$ 0.6             | 0.277          |
| LVEF, %                                            | 45.0 $\pm$ 3.9        | 23.6 $\pm$ 2.6            | 0.002          |
| <b>HF Etiology</b>                                 |                       |                           |                |
| Ischemic cardiomyopathy, n (%)                     | 2 (40.0)              | 2 (40.0)                  |                |
| Non-ischemic cardiomyopathy, n (%)                 | 3 (60.0)              | 3 (60.0)                  |                |
| <b>New York Heart Association Functional Class</b> |                       |                           |                |
| III, n (%)                                         | 2 (40.0)              | 2 (40.0)                  |                |
| IV, n (%)                                          | 3 (60.0)              | 3 (60.0)                  |                |

**Table S2.** Clinical characteristics of the study population, donors. CVA – cardiovascular accident.

| <b>Variable</b>       | <b>Donors, N=5, (Mean ± SEM)</b> |
|-----------------------|----------------------------------|
| <b>Female, n (%)</b>  | 5 (100%)                         |
| <b>Age</b>            | 38 ± 12                          |
| <b>Weight</b>         | 72 ± 16                          |
| <b>Cause of death</b> |                                  |
| CVA Stroke            | 40%                              |
| Anoxia                | 40%                              |
| Head Trauma           | 20%                              |

**Table S3.** List of primers used in this study.

|                                 |         |                                         |
|---------------------------------|---------|-----------------------------------------|
| <i>β-Actin</i> - mouse          | Forward | TGT TAC CAA CTG GGA CGA                 |
|                                 | Reverse | GGG GTG TTG AAG GTC TCA                 |
| <i>Nppa</i> (ANF)- mouse        | Forward | CTG ATG GAT TTC AAG AAC CTG CT          |
|                                 | Reverse | CTC TGG GCT CCA ATC CTG TC              |
| <i>Myh6</i> (αMHC)- mouse       | Forward | GAA CAG CTG GGA GAA GGG GG              |
|                                 | Reverse | GCC TCT GAG GCT ATT CIA TTG G           |
| <i>Myh7</i> (βMHC)- mouse       | Forward | GAA CAG CTG GGA GAA GGG GG              |
|                                 | Reverse | GCC TCT GAG GCT ATT CTA TTG G           |
| <i>Apt2a2</i> (Serca2a)- mouse  | Forward | CCT TCT ACC AGC TGA GTC ATT T           |
|                                 | Reverse | CAG ATG GAG CCC ACG ACC CA              |
| <i>Ppargc1</i> (PGC-1α)- mouse  | Forward | CTT CGA GCT GTA CTT TTG TGG ACG GAA     |
|                                 | Reverse | CTC TGA GCT TCC TTC AGT AAA CTA TCA AA  |
| <i>Vim</i> - mouse              | Forward | TGA GAT CGC CAC CTA CAG GA              |
|                                 | Reverse | TGA TCA CCT GTC CAT CTC TGG             |
| <i>Col1a1</i> - mouse           | Forward | GGT CAG ACC TGT GTG TTC CC              |
|                                 | Reverse | GGT CCA TGT AGG CTA CGC TG              |
| <i>Smyd1a</i> - mouse           | Forward | GTG AAA TCC ATG TTT CAC ACG CAG ATG AG  |
|                                 | Reverse | CAG GAA GAG GTC GTC CTT CAG C           |
| <i>Smyd1b</i> - mouse           | Forward | CTG CAC TGT CAT ATT CAA CAA TGG CAA GAT |
|                                 | Reverse | CAG GAA GAG GTC GTC CTT CAG C           |
| <i>Smyd1</i> - human            | Forward | GCC CAT TAC TGC GAC CGC AC              |
|                                 | Reverse | CTC CCC AAA GTG CTC CAC GTG G           |
| <i>Smyd1</i> - mouse genotyping | Forward | CTC GCT CCG AGG GTT TGT ATC ACG         |
|                                 | Reverse | CTT ATC GTC GTC ATC CTT GTA ATC CAG G   |
| <i>Smyd2</i> - mouse            | Forward | GGA GGG CCA AAC ACT ACA AA              |
|                                 | Reverse | TGA GGG AGT ACA CGG GGT AG              |
| <i>Smyd3</i> - mouse            | Forward | TGA TGA AAG TTG GCA AGC TG              |
|                                 | Reverse | GTC CTT CTG GGG GTC CTT G               |
| <i>Smyd4</i> - mouse            | Forward | CGA ACC GGT AAA CCA GAG CA              |

|                                |         |                               |
|--------------------------------|---------|-------------------------------|
|                                | Reverse | ATG GCG AGT TTC AAC CAC CT    |
| <i>Smyd5</i> - mouse           | Forward | CTG ATT CGG AAG GGA GAG AC    |
|                                | Reverse | TTC TGG TGG AGG TCC TTA CG    |
| <i>16S rRNA</i> - mouse        | Forward | CCG CAA GGG AAA GAT GAA AGA C |
|                                | Reverse | TCG TTT GGT TTC GGG GTT TC    |
| <i>ND1</i> - mouse             | Forward | CTA GCA GAA ACA AAC CGG GC    |
|                                | Reverse | CCG GCT GCG TAT TCT ACG TT    |
| <i>Opa1</i> - mouse/rat        | Forward | ATA CTG GGA TCT GCT GTT GG    |
|                                | Reverse | AAG TCA GGC ACA ATC CAC TT    |
| <i>Opa1 -1.0 kb</i>            | Forward | GGC GGG ACT TGT ATA GTG CT    |
|                                | Reverse | CTC CCG GAA TCC TTA ATG GGG   |
| <i>Opa1 0.1 kb</i>             | Forward | CCC TCA GCA ACA AGG GCA TA    |
|                                | Reverse | ACG TTA TCC GCG GCA CAT TT    |
| <i>Opa1 1.0 kb</i>             | Forward | TCG CAG ATG TTG TTG CCC TA    |
|                                | Reverse | GTG CTA AGC TTG GGG GCT AT    |
| <i>Intergenic region (rat)</i> | Forward | ATT TTG TGC TGC ATA ACC TCC T |
|                                | Reverse | TAG CAA CAT CCT AAG CTG GAC A |
| <i>TBP - rat</i>               | Forward | GAA GTT TTG CAC CCC ATC CT    |
|                                | Reverse | CAG GGG CCA ACT GAA AAC AG    |

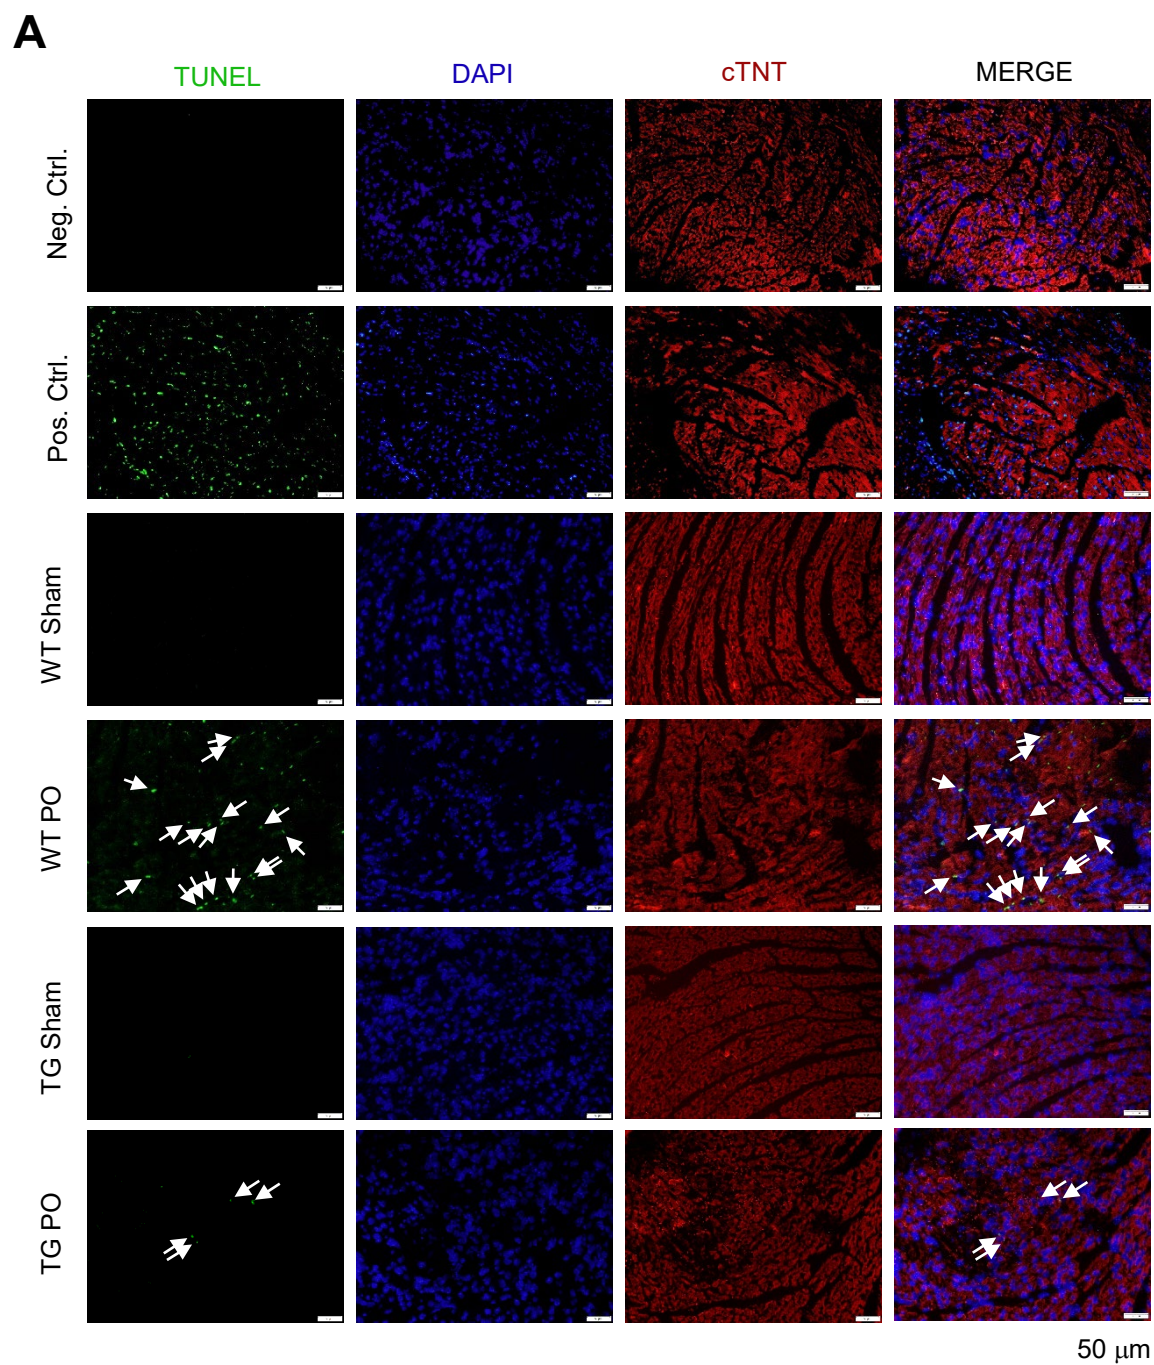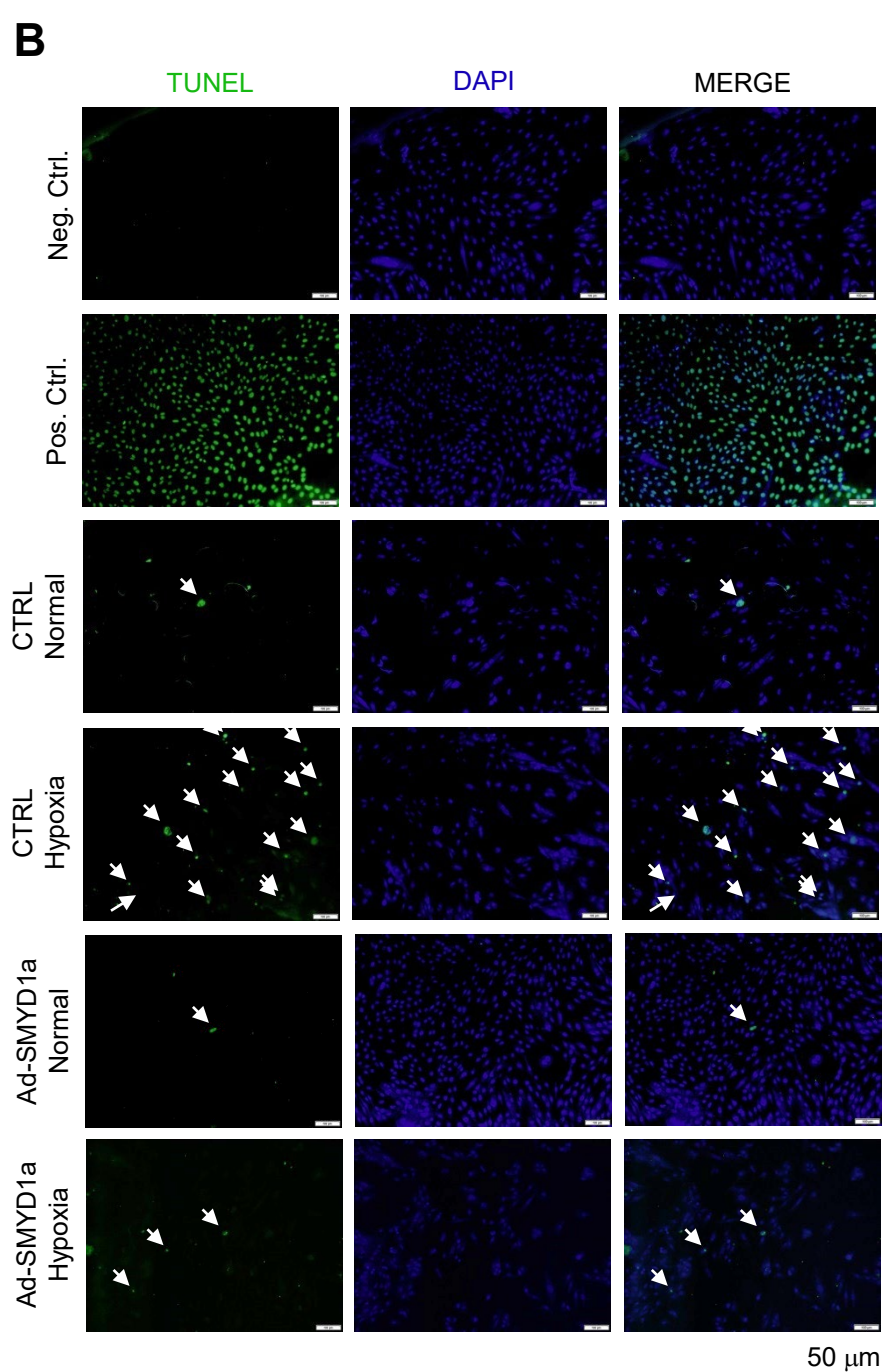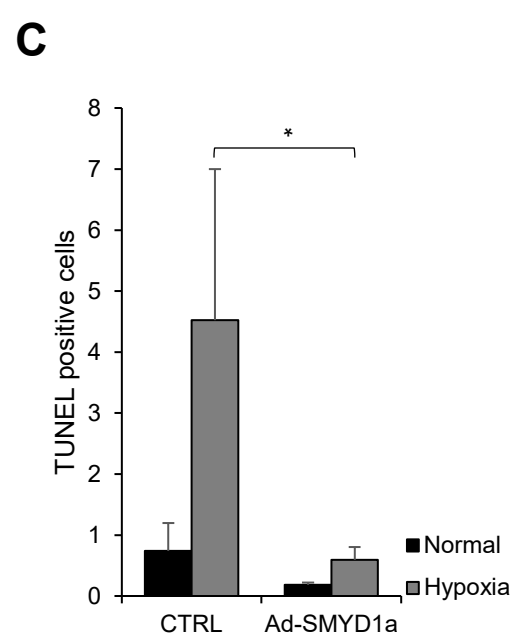

**Fig. S1. SMYD1a overexpression attenuates apoptotic cell death.** Apoptosis was detected by TUNEL assay in (A) cardiac tissue harvested 48h after PO (or Sham) surgery and in (B) H9c2 cardiomyoblasts that were overexpressing SMYD1a (by adenovirus) and subjected to hypoxic conditions. The results indicated significant decrease in apoptosis in TG PO mice when compared to WT PO group or in H9c2 cells overexpressing SMYD1a when compared to controls. DAPI staining shown in blue, cardiac troponin staining shown in red, TUNEL staining shown in GREEN and arrows point to TUNEL positive cells. Neg.Ctrl. indicates negative control and Pos.Ctrl. indicates positive control. Asterisk \* indicates  $p < 0.05$ ,  $n = 9-15$ .

**A**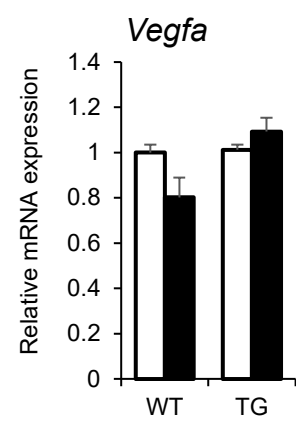**B**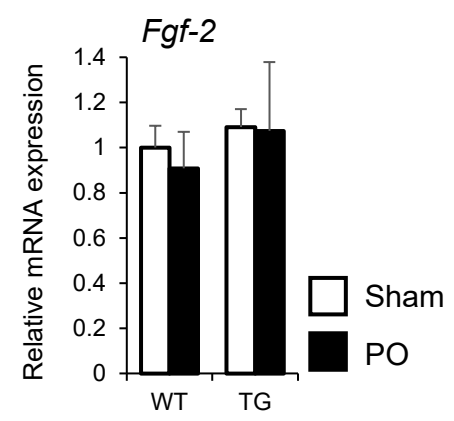

**Fig. S2. SMYD1a overexpression has no effect on angiogenesis in TG mice. A,B)** Markers of angiogenesis **A) *Vegfa*** and **B) *Fgf-2*** were measured by qRT-PCR and values expressed as relative mRNA intensities relative to WT control mice. n=4-6.

**A**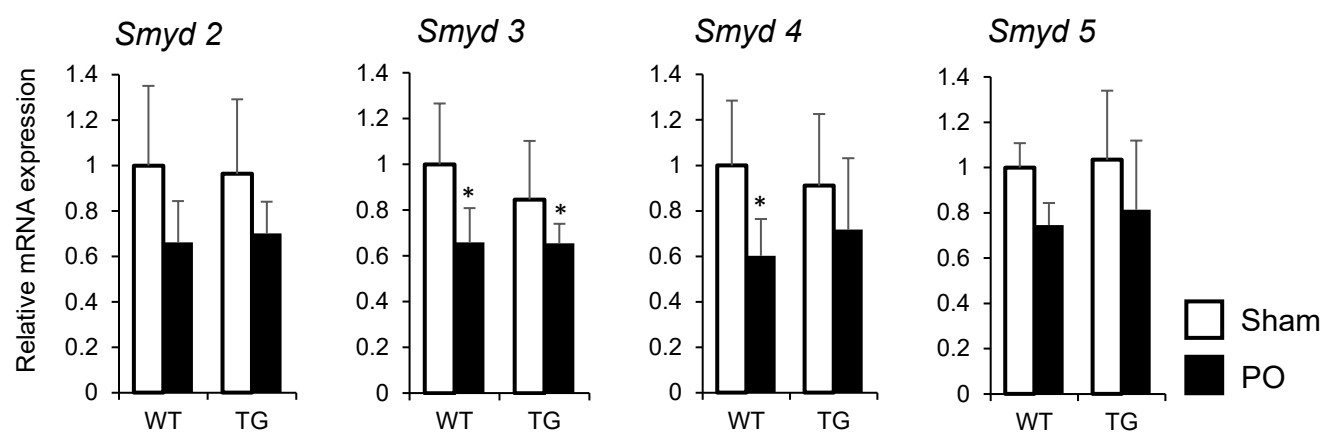**B**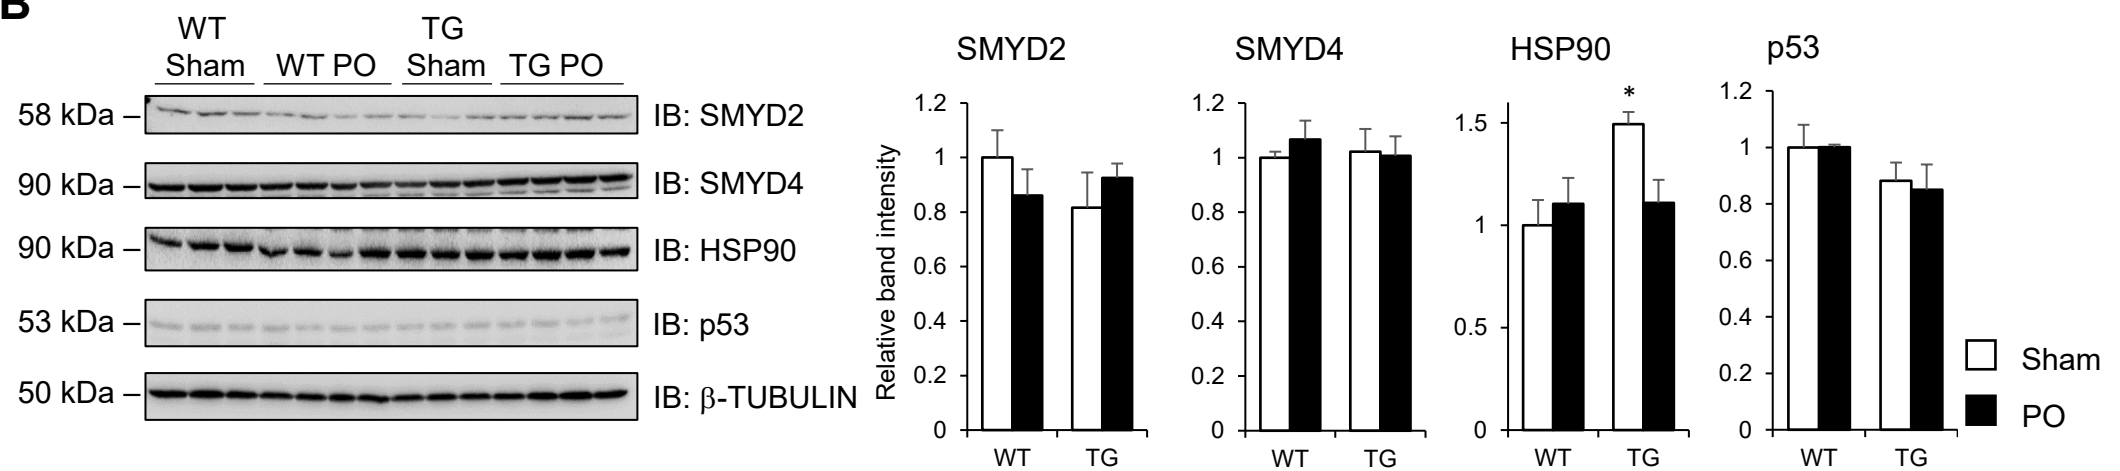

**Fig. S3. SMYD1a overexpression has no effect on expression of SMYD family members.** **A)** SMYD family members: *Smyd2*, *Smyd3*, *Smyd4* and *Smyd5* were measured by qRT-PCR and values expressed as relative mRNA intensities relative to WT control mice. Asterisk \* indicates  $p < 0.05$  to sham control,  $n=4-6$ . **B)** As indicated by western blotting, overexpression of SMYD1a or permanent occlusion (PO) had no effect on levels of SMYD2, SMYD4 and p53, however there is a significant increase in HSP90 in TG Sham group as compared to WT controls. Asterisk \* indicates  $p < 0.05$ ,  $n=3-4$ .



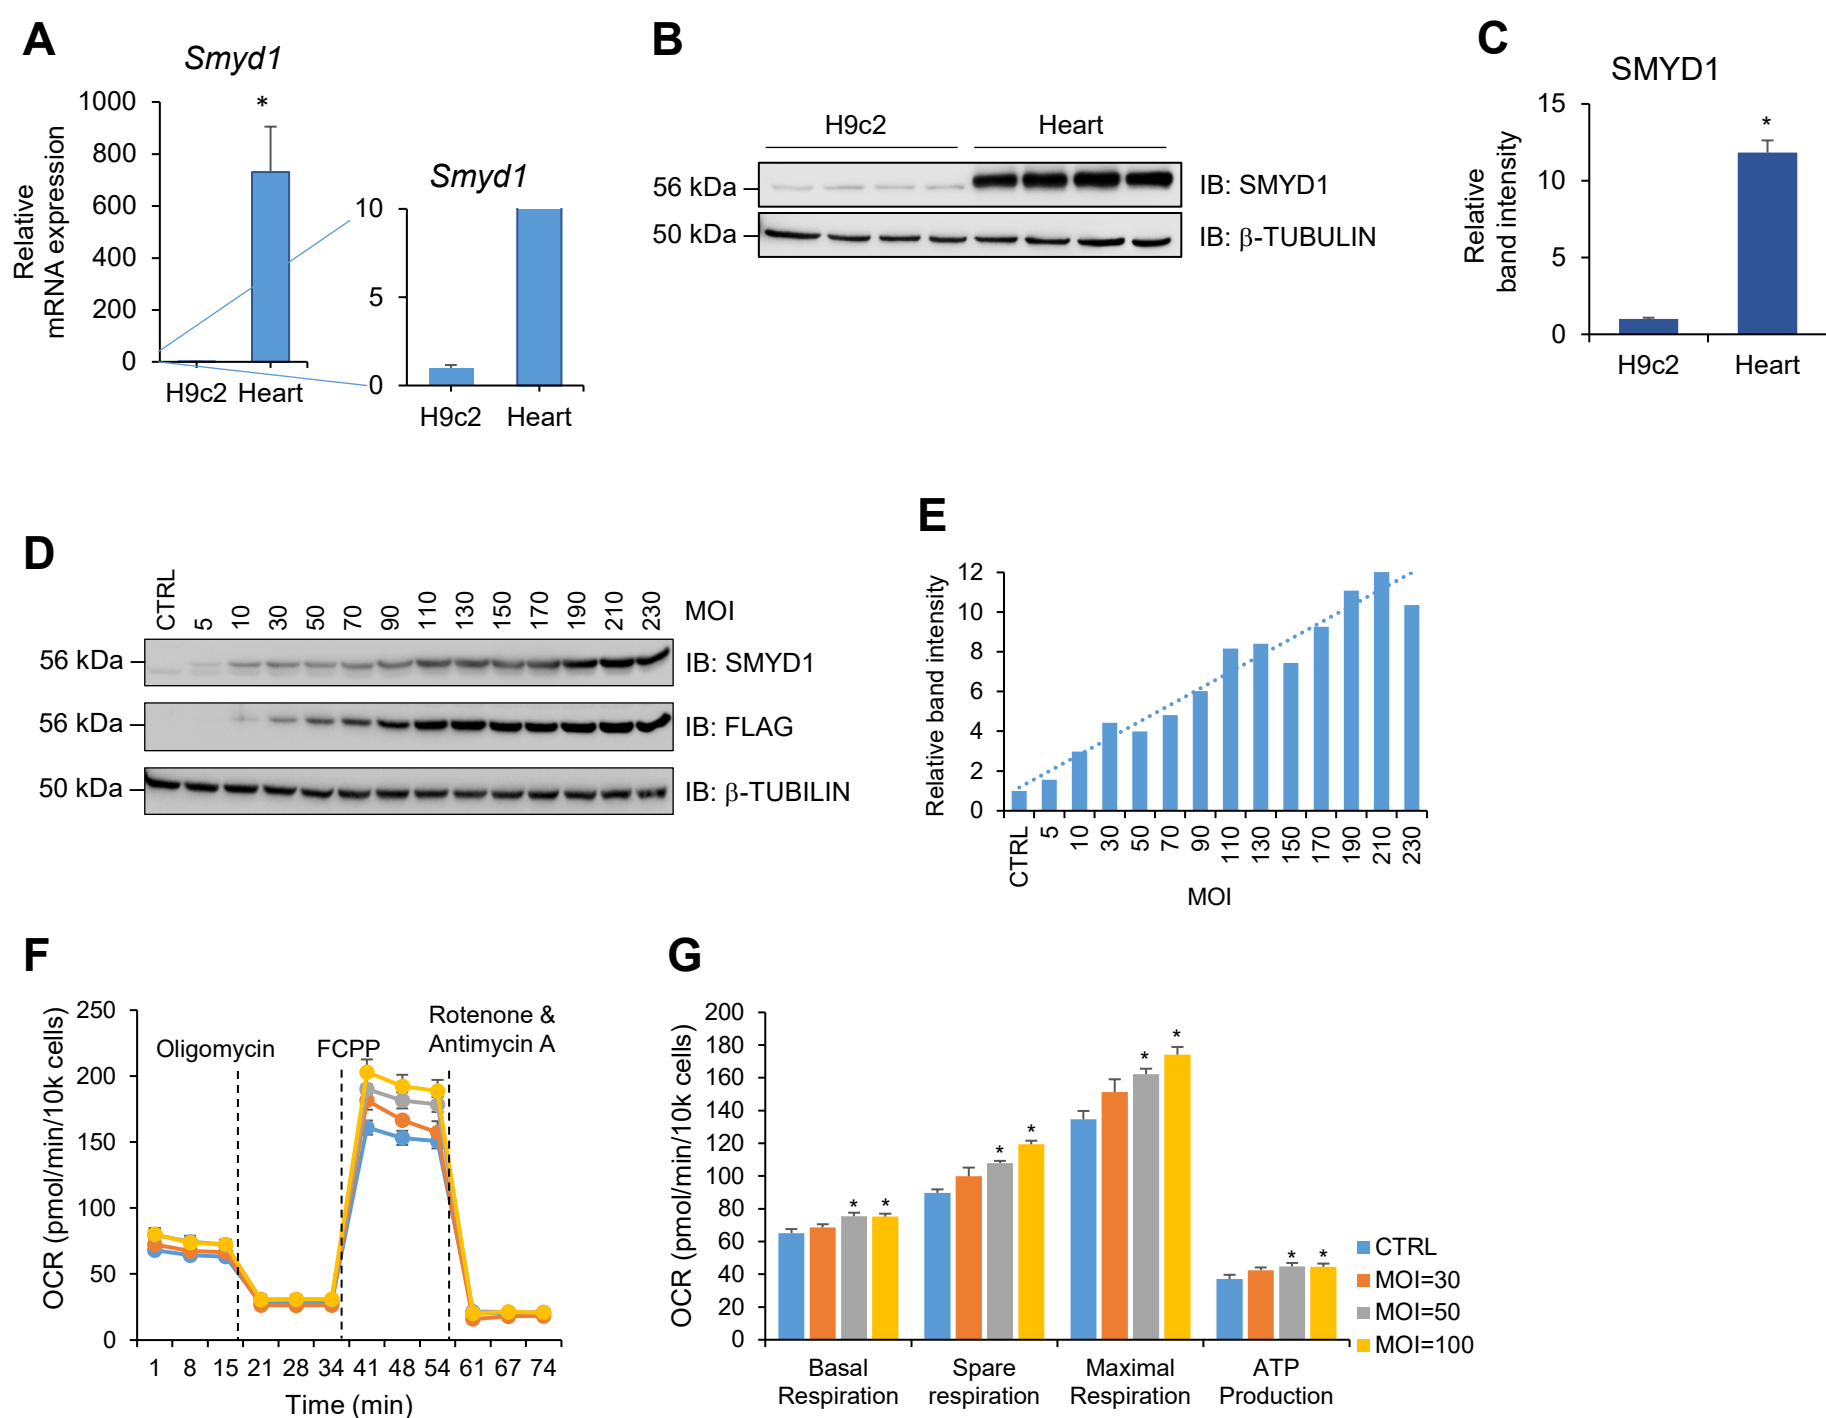

**Fig. S4. Basal expression of SMYD1a in cardiac tissue and H9c2 cardiomyoblasts.** Expression at both the transcript (A) and protein (B,C) levels shows that SMYD1's basal expression is much higher in cardiac tissue as compared to H9c2 cardiomyoblasts. D,E) Adenovirus mediated increasing overexpression of SMYD1a in H9c2 cells detected by western blotting and quantified. F) Cell Mito Stress test was conducted using a Seahorse Bioscience XFe96 analyzed by sequentially injecting 1mM oligomycin, 5mM FCCP, and 1mM rotenone+antimycin A inhibitors. H9c2 cardiomyoblasts were transduced with Ad-SMYD1a and oxygen consumption rates (OCR) were recorded and quantified in the presence of pyruvate as substrate. G) Quantitative analysis of mitochondrial OCR from H9c2 cells overexpressing SMYD1a indicates significant increases in respiration starting at MOI=50. Asterisk \* indicates  $p < 0.05$ ,  $n = 5-12$ .

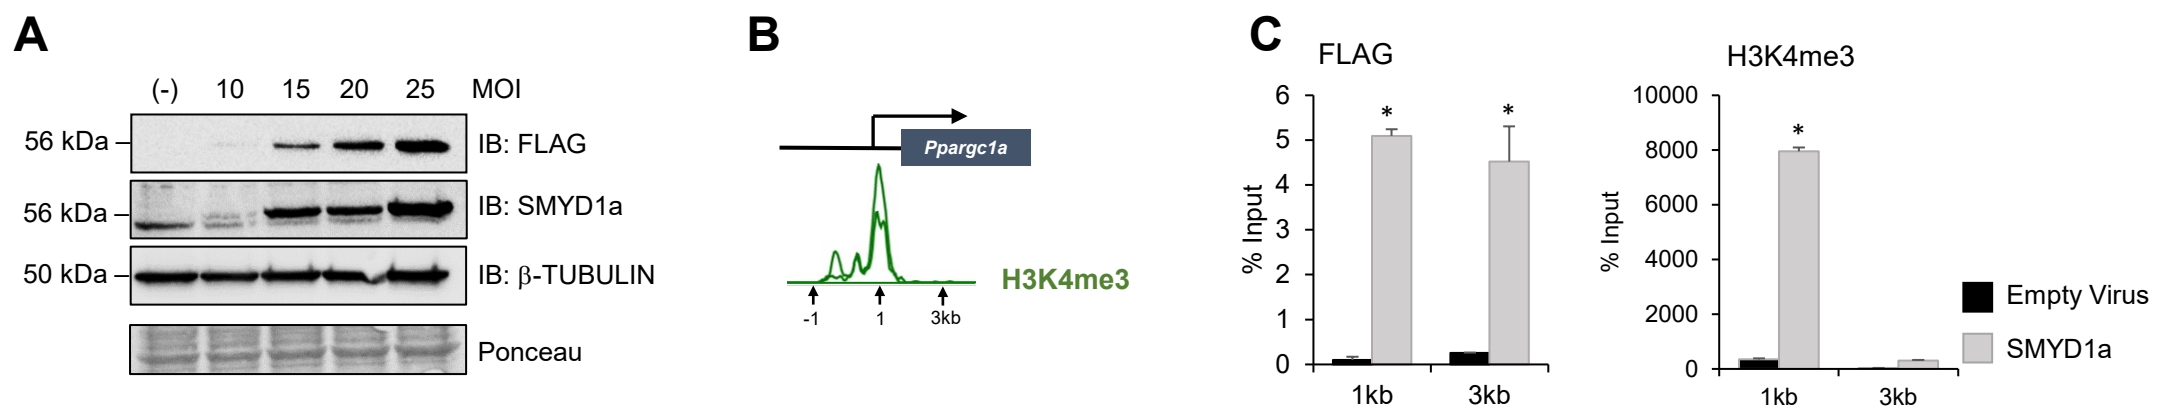

**Fig. S5. SMYD1a binds to the promoter of *Pparg1 $\alpha$*  and regulates its expression through histone H3K4me3 in isolated cells.** **A)** Adenoviral transduction of NRVMs led to a robust SMYD1a expression, as confirmed by western blotting. **B)** Publicly available ChIP-Seq data for histone H3K4me3 at the *Pparg1 $\alpha$*  promoter were used to design primers to use in ChIP-qPCR for SMYD1a-FLAG and histone H3K4me3 in isolated NRVMs showing **C)** binding at the *Pparg1 $\alpha$*  promoter, which increases trimethylation of histone H3K4me3 under basal conditions. Asterisk \* indicates  $p < 0.05$ ,  $n = 2$ .

**A**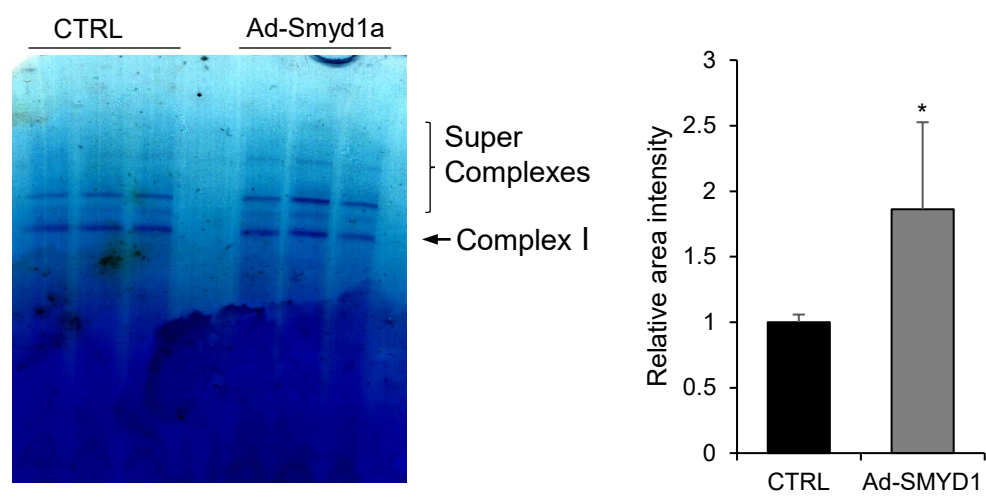**B**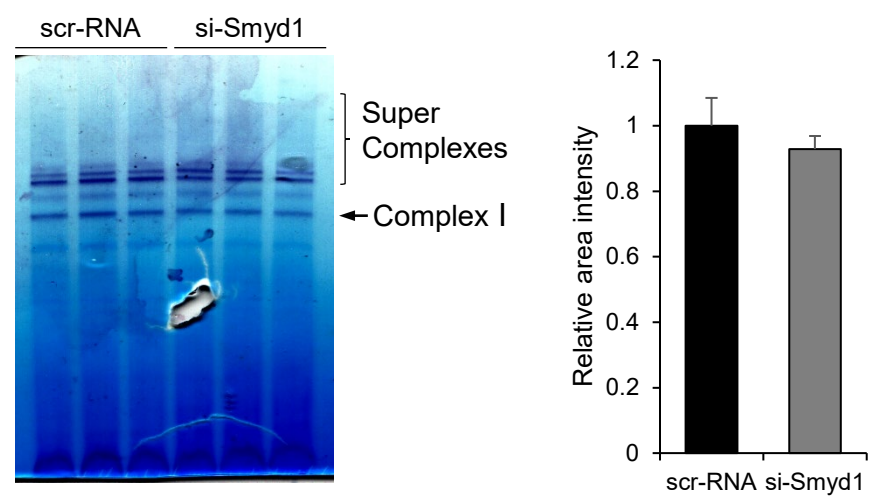

**Fig. S6. SMYD1a overexpression increases supercomplex formation in H9c2 cardiomyoblasts but knockdown of *Smyd1* has no effect.** Blue-native PAGE gel stained with Coomassie, evaluated for Complex I activity and quantified in H9c2 cardiomyoblasts 48h after A) adenovirus mediated overexpression of SMYD1a or B) si-RNA driven knockdown of *Smyd1*. Asterisk \* indicates  $p < 0.05$ ,  $n = 3$ .

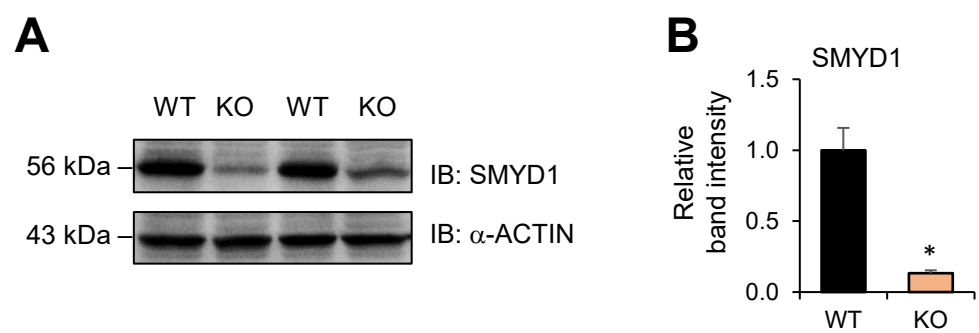

**Fig. S7. Cardiac specific deletion of *Smyd1*.** Mice fed tamoxifen diet for 3 weeks show nearly a complete loss of SMYD1 protein in the heart, as demonstrated by western blotting. WT – wild type, KO – *Smyd1* knockout. Asterisk \* indicates  $p < 0.05$ ,  $n = 3$ .

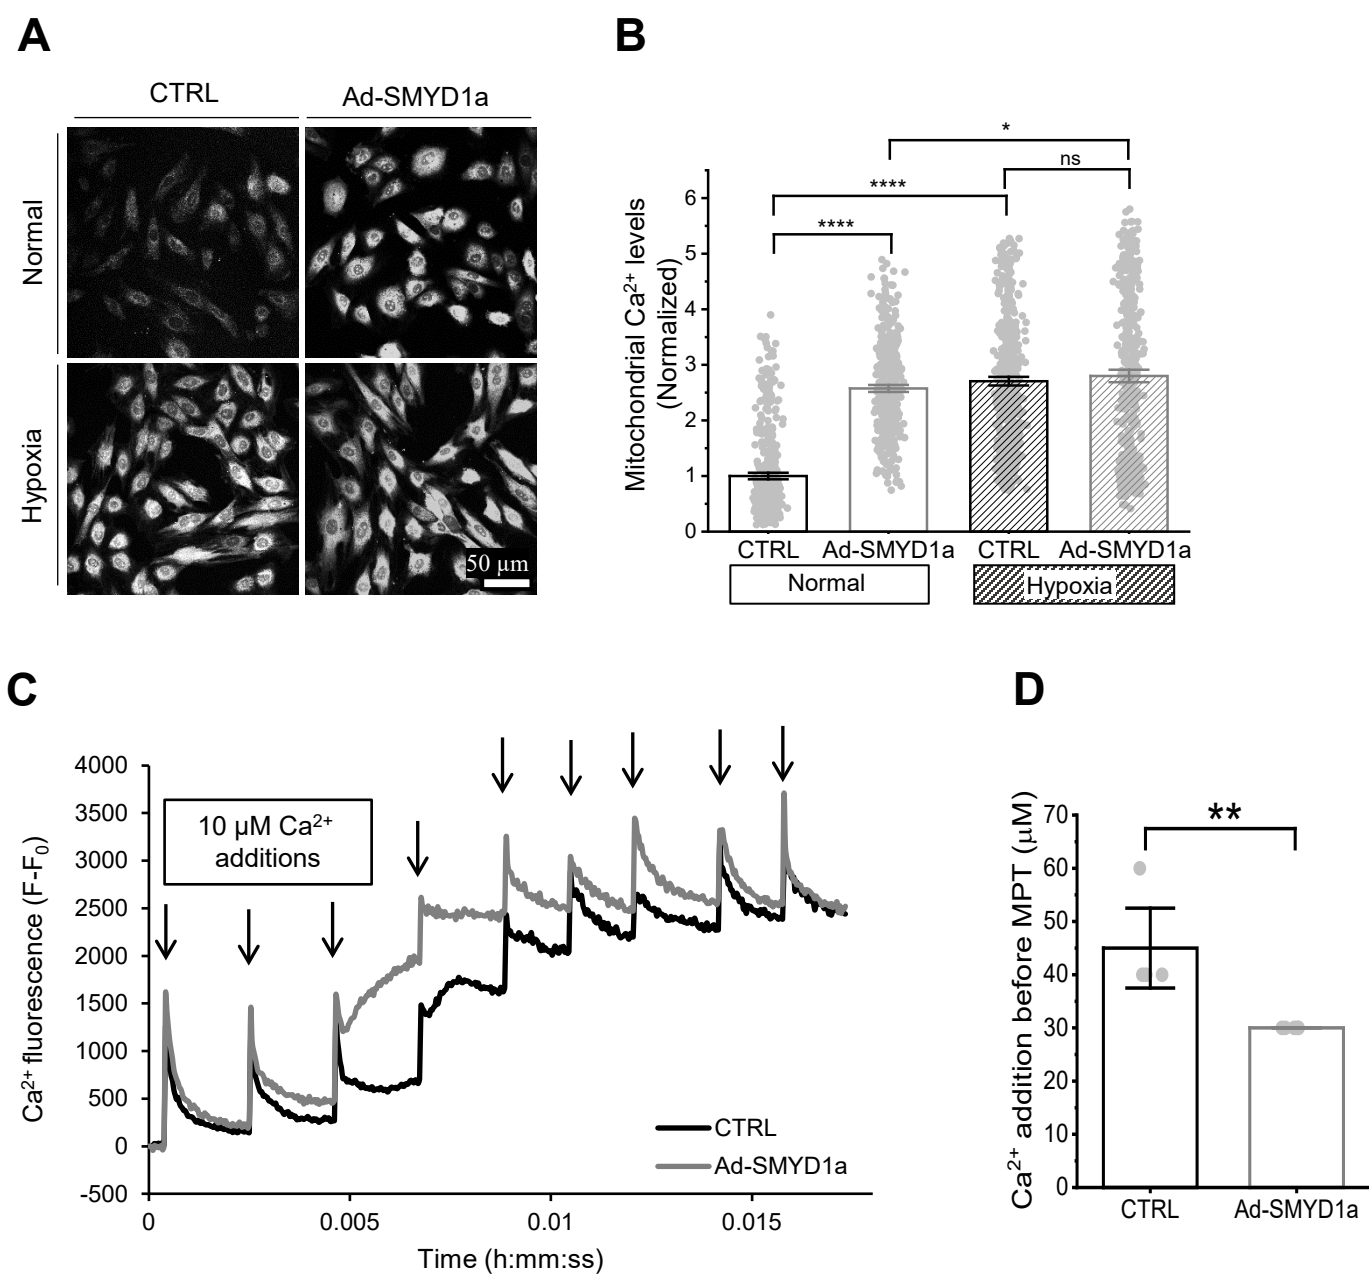

**Fig. S8. SMYD1a overexpression induces mitochondrial calcium uptake but remains unchanged in hypoxic conditions. A)** Representative images showing control and SMYD1a overexpressing H9c2 cardiomyoblasts stained with the mitochondrial  $\text{Ca}^{2+}$  sensor, XRhod1. **B)** Changes in mitochondrial  $\text{Ca}^{2+}$  levels following XRhod1 staining in control and SMYD1a overexpressing H9c2 cardiomyoblasts. Asterisk \* indicates  $p < 0.05$ , \*\*\*\* indicates  $p < 0.0001$ ,  $n = 408-485$ . **C)** A representative calcium retention trace of control and SMYD1a overexpressing H9c2 cardiomyoblasts. Black arrows indicate  $5 \text{mM}$   $\text{Ca}^{2+}$  injections. Mitochondrial viability was measured as  $\Delta\Psi/\text{TMRM}$  fluorescence. The graph is representative of five experiments each with  $5 \times 10^{-5}$  cells. **D)** Comparison of calcium retention before the triggering of an MPT event in control and SMYD1a overexpressing cells. Asterisk \*\* indicates  $p < 0.01$ ,  $n = 3$ .

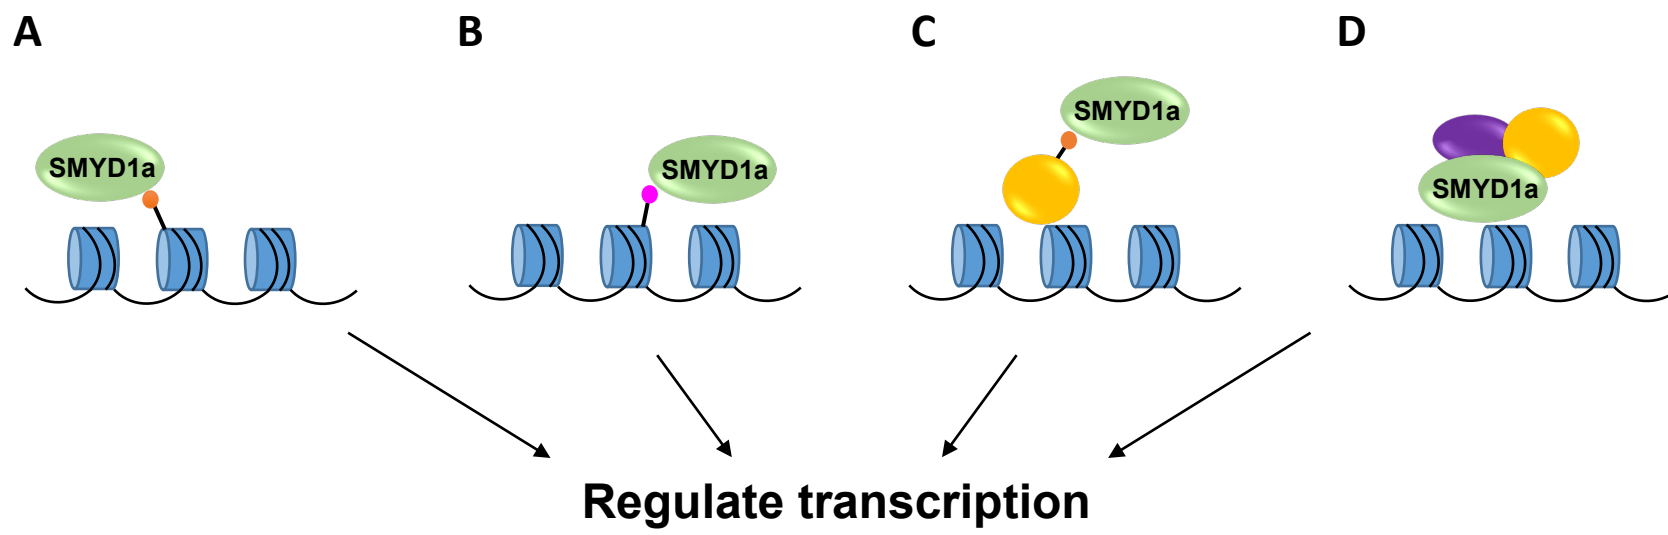

**Fig. S9. Schematic diagram representing possible mechanisms by which SMYD1a could regulate gene expression.** **A)** Canonically, SMYD1a activates transcription by trimethylation of histone H3 on lysine K4. **B)** However, based on data from other methyltransferases, it is possible that SMYD1a targets another histone PTM through which it regulates gene expression. **C)** In addition, SMYD1a could also regulate transcription by methylating other chromatin binding protein or **D)** through methyltransferase-independent mechanism, as a component of a chromatin binding complex. All of these four mechanisms have previously been shown to be utilized by methyltransferases to regulate gene expression.

**A**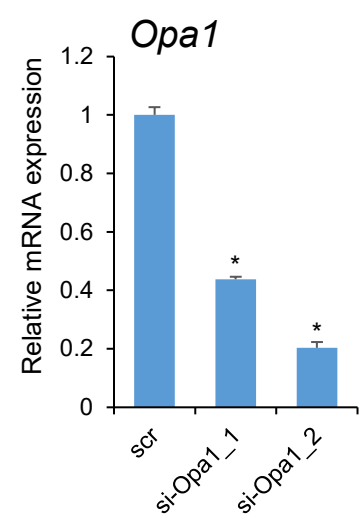**B**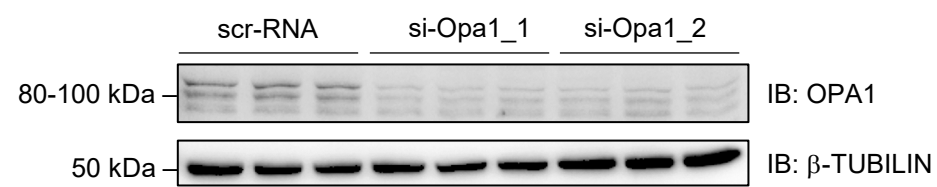

**Fig. S10. Knockdown of *Opa1*.** si-RNA-mediated knockdown of *Opa1* in H9c2 cardiomyoblasts showed significantly reduced levels of mRNA expression evaluated by (A) qRT-PCR and OPA1 protein as determined by (B) western blot analysis. Asterisk \* indicates  $p < 0.05$ ,  $n = 3$ .
